# Supplementary material for: Low temperature synthesis route and structural characterization of (Bi0.5A0.5)(Sc0.5Nb0.5)O3 (A = K+ and Na+) perovskites
Source: Royal Society of Chemistry journal article supplement (doi:10.1039/c8qi00144h), 2018-01-01
Supplement: c8qi00144h1.pdf [file c8qi00144h1.pdf]

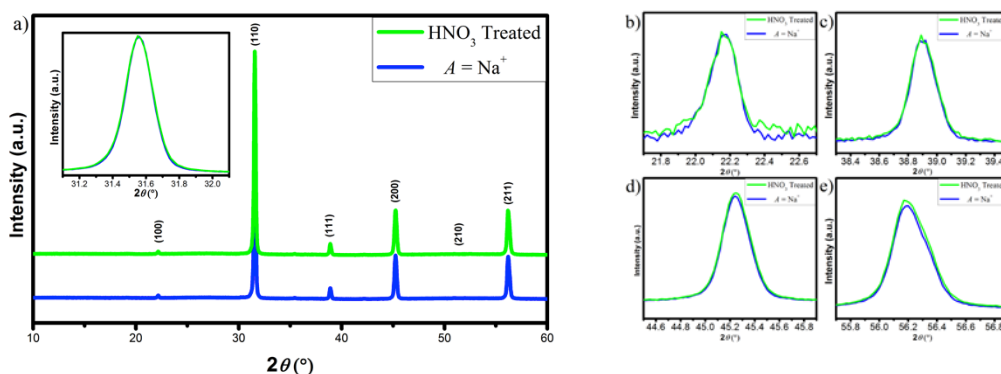

**Figure S.1.** XRD data for  $A = \text{Na}^+$  as prepared and after treatment with concentrated nitric acid. **a)** Data from  $10 - 60^\circ$ , inset shows the (110) reflection, **b)** the (100) reflection, **c)** the (111) reflection, **d)** the (200) reflection, and **e)** the (211) reflection.

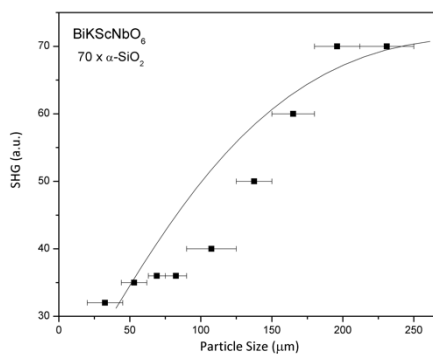

**Figure S.2.** SHG efficiency as a function of particle size for  $A = \text{K}^+$ .

**Table S.1.** Space group,  $R_{\text{wp}}$ ,  $\chi^2$ , and  $A$ -site  $B_{\text{eq}}$  for Rietveld refinements on  $A = \text{K}^+$ . Results shown for  $P4mm$ ,  $Amm2$ , and  $R3m$  have been refined without constraints on the atomic positions of  $A$ -site cations.

| Space Group       | $R_{\text{wp}}$ | $\chi^2$ | $B_{\text{eq}}^\dagger$ |
|-------------------|-----------------|----------|-------------------------|
| $Pm\bar{3}m$      | 7.44            | 3.14     | 10.51(9)                |
| $P4mm$            | 6.86            | 2.72     | 10.73(3)                |
| $Amm2$            | 6.81            | 2.63     | 10.70(2)                |
| $R3m$             | 6.96            | 2.74     | 10.70(4)                |
| $Pm\bar{3}m[100]$ | 7.05            | 2.82     | 4.58(5)                 |

$^\dagger$  isotropic displacement parameter of the  $A$ -site Cation

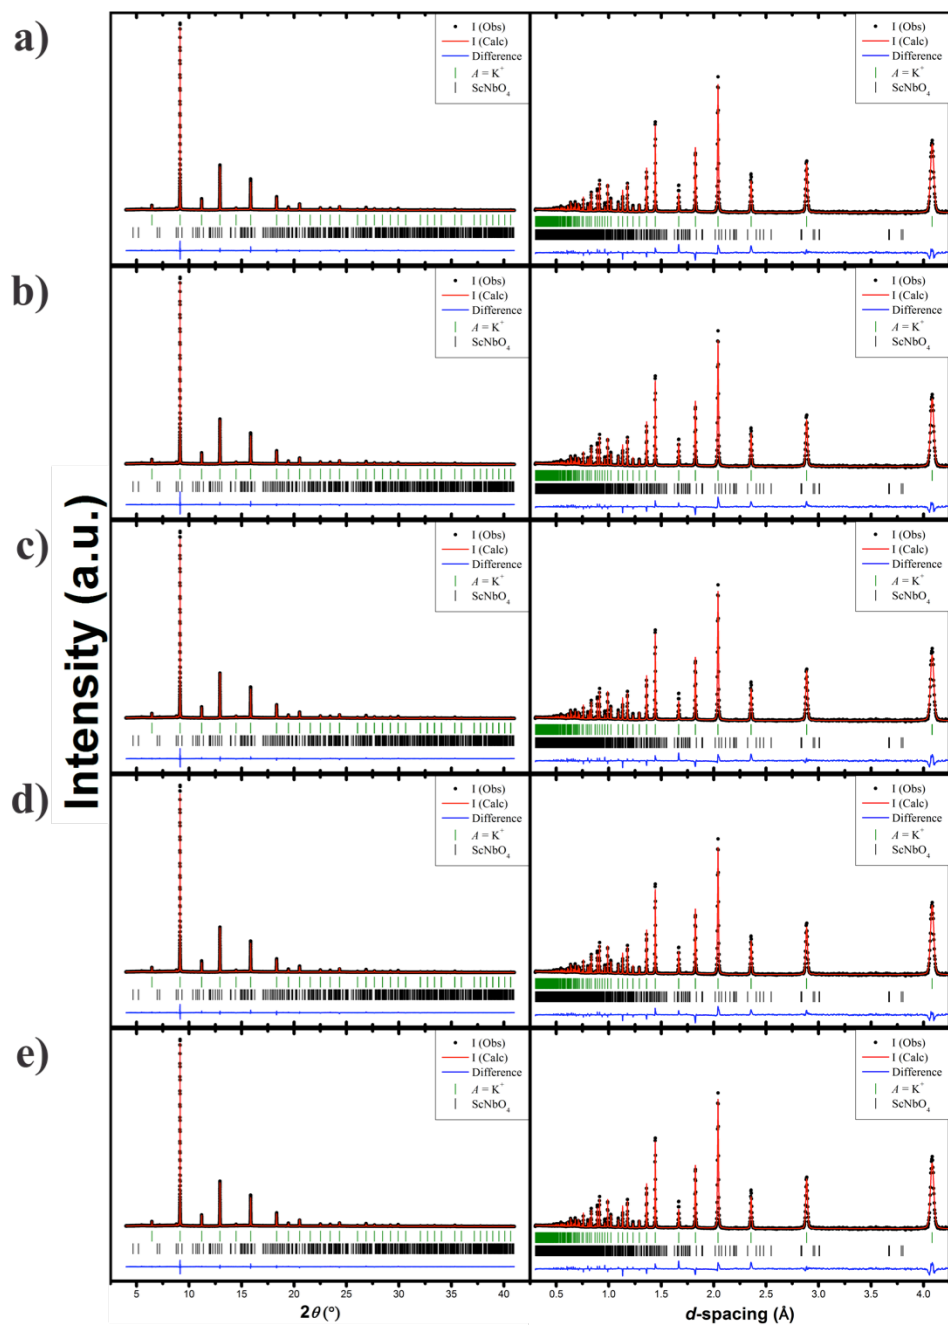

**Figure S.3.** Results of combined Rietveld refinement on  $A = K^+$  using synchrotron XRD and NPD data for a)  $Pm\bar{3}m$ , b)  $P4mm$ , c)  $Amm2$ , d)  $R3m$ , and e)  $[100]$  distorted  $Pm\bar{3}m$ .

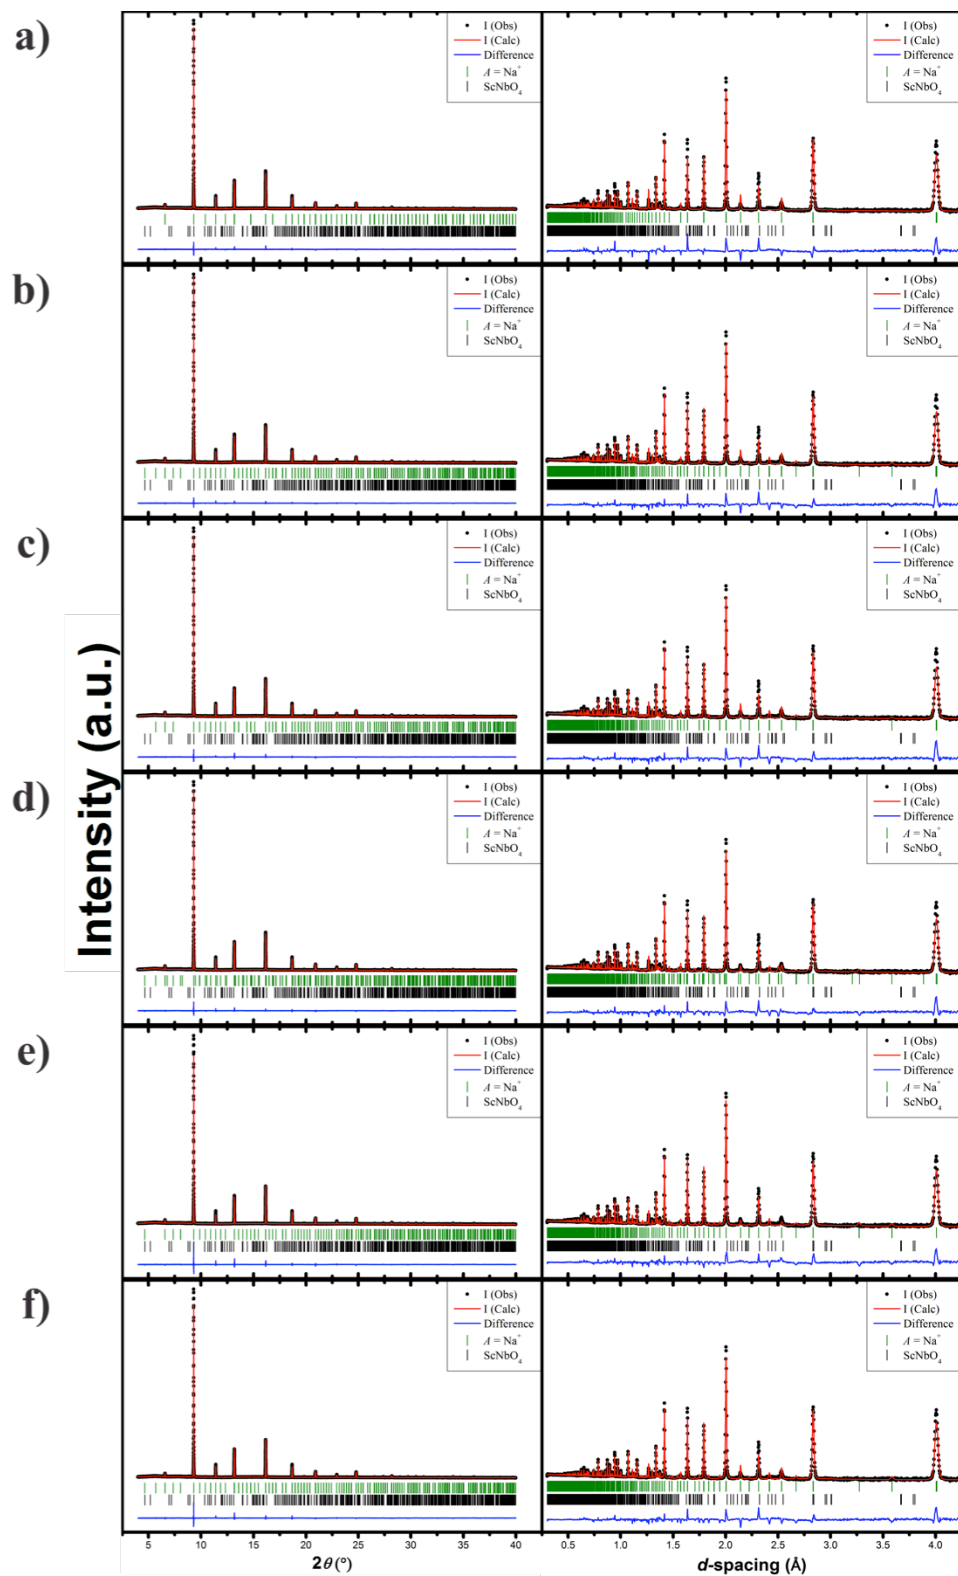

**Figure S.4.** Results of combined Rietveld refinement on  $A = \text{Na}^+$  using synchrotron XRD and NPD data for a)  $P4/mbm$ , b)  $Cmcm$ , c)  $Pbnm$ , d)  $Pbcm$ , and e)  $R3c$ , and f)  $P2_1/m$ .

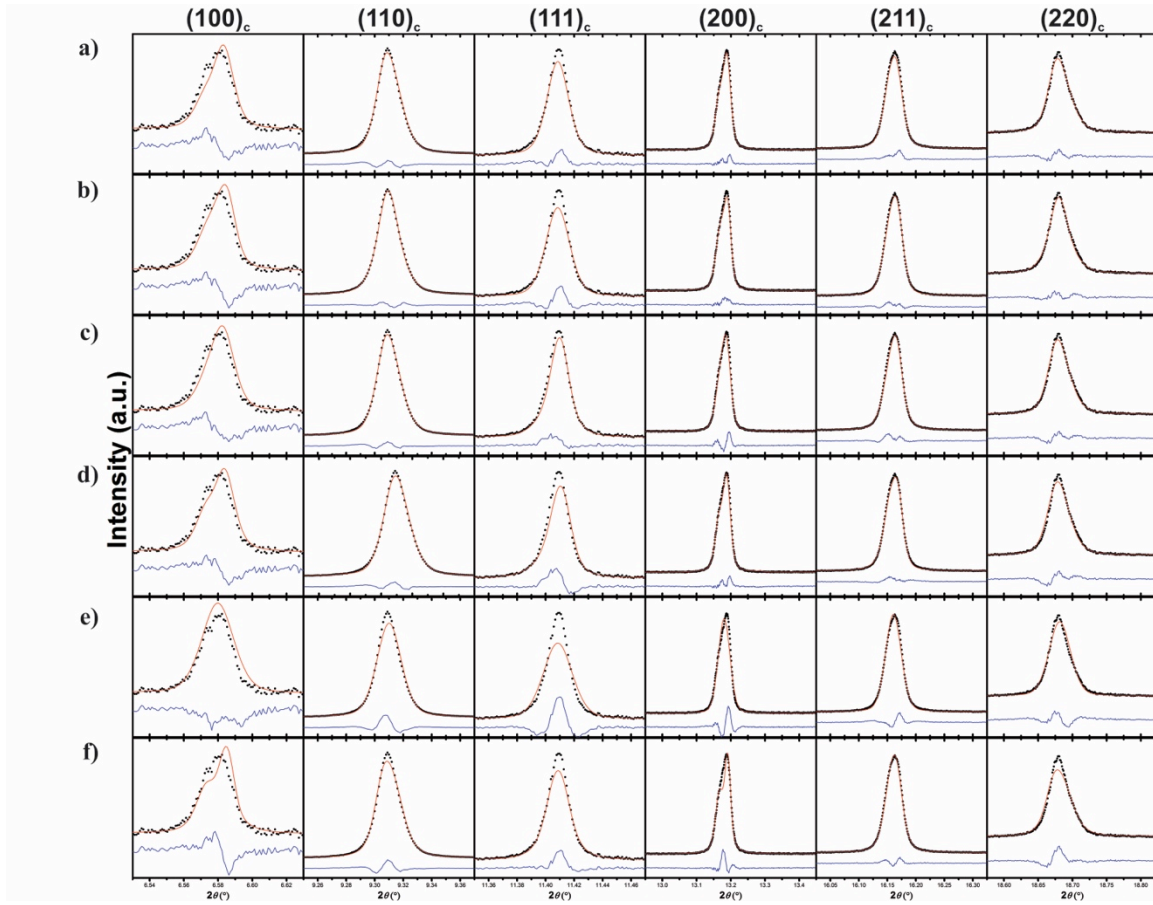

**Figure S.5.** The fits of selected peaks for Rietveld refinement of XRD data for  $A = \text{Na}^+$  in **a)**  $P4/mbm$ , **b)**  $Cmcm$ , **c)**  $Pbnm$ , **d)**  $Pbcm$ , and **e)**  $R3c$ , and **f)**  $P2_1/m$  symmetry.

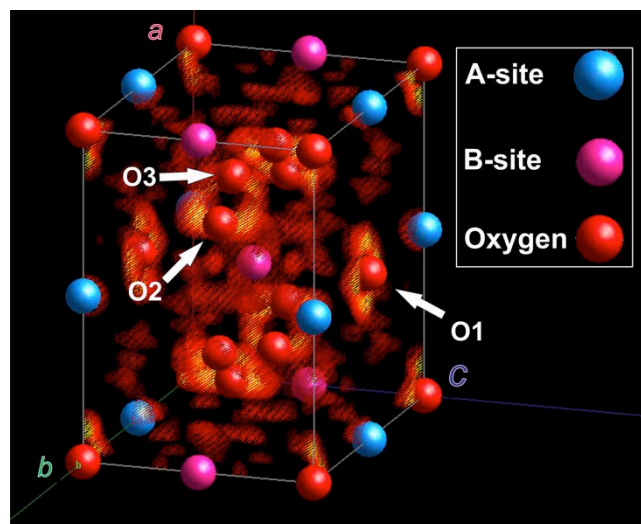

**Figure S.6.** Fourier difference map calculated from the Rietveld refinement of  $A = \text{Na}^+$  in  $P4/mbm$ , with a split oxygen site, on NPD data
